# Supplementary material for: Is Stress Taking the Pleasure Out of Food?—A Characterization of the Food Pleasure Profiles, Appetite, and Eating Behaviors of People with Chronic Stress
Source: MDPI journal article supplement (doi:10.3390/foods11131980), 2022-07-04
Supplement: s1 [file s1]

## Supplementary material

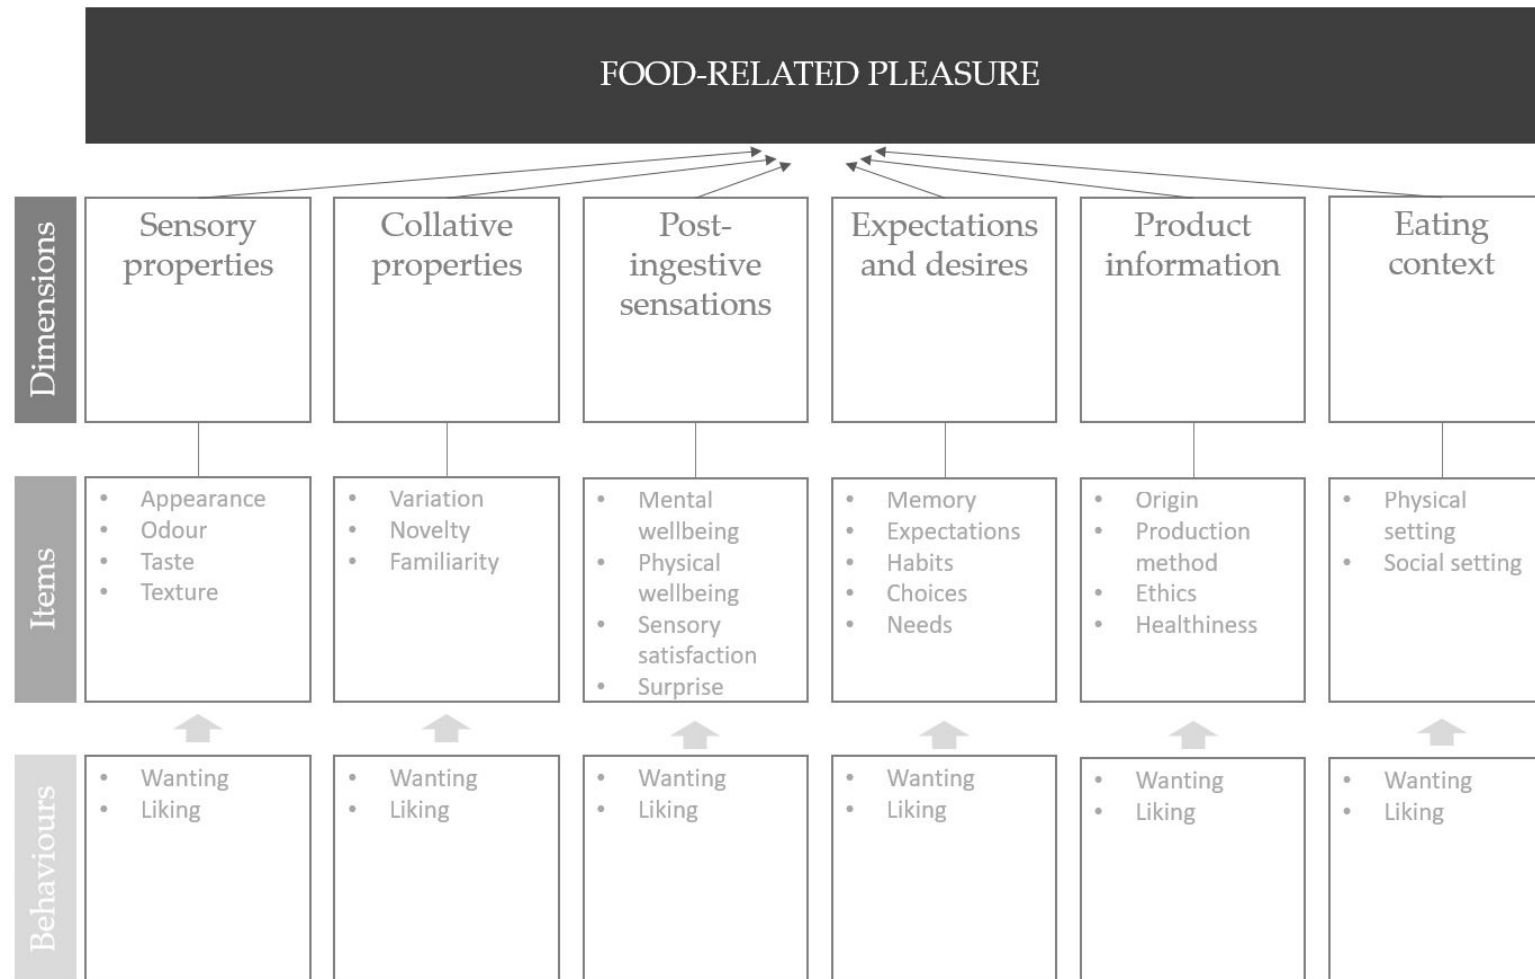

**Figure S1.** Schematic conceptualisation of the key dimensions, items, and behavioural elements involved in the individual food-related pleasure response, allowing a holistic study of quantitative (level of pleasure) and qualitative (drivers of pleasure) aspects of food-related pleasure. The model is kindly borrowed from Andersen, B. V., Chan, R. C. K., & Byrne, D. V. (2021). A Conceptual Framework for Multi-Dimensional Measurements of Food Related Pleasure—The Food Pleasure Scale. *Foods*, 10(9), 2044. <https://doi.org/10.3390/foods10092044>

**Table S1.** Transcript of questions included in the questionnaire based on The Food Pleasure Scale.

|                                                                                                                                                                                                                                                                                     |                                     |                     |
|-------------------------------------------------------------------------------------------------------------------------------------------------------------------------------------------------------------------------------------------------------------------------------------|-------------------------------------|---------------------|
| The following questions are about food-related pleasure. First, we want you to assess, which aspects you find pleasure from. Please, try and think of how you feel in the current moment.                                                                                           |                                     |                     |
| Do you, in this moment, get pleasure from the following aspects of food and meals?                                                                                                                                                                                                  |                                     |                     |
| To experience memories of food?                                                                                                                                                                                                                                                     | Yes                                 | No                  |
| To have expectations towards the food fulfilled?                                                                                                                                                                                                                                    | Yes                                 | No                  |
| To experience the satisfaction of needs?                                                                                                                                                                                                                                            | Yes                                 | No                  |
| To experience having choices in the eating situation?                                                                                                                                                                                                                               | Yes                                 | No                  |
| To maintain habits?                                                                                                                                                                                                                                                                 | Yes                                 | No                  |
| To fulfill ethical values about food?                                                                                                                                                                                                                                               | Yes                                 | No                  |
| To experience having desired product information about food?                                                                                                                                                                                                                        | Yes                                 | No                  |
| To experience physical surroundings?                                                                                                                                                                                                                                                | Yes                                 | No                  |
| To experience food variation?                                                                                                                                                                                                                                                       | Yes                                 | No                  |
| To experience new/unknown food? (Novelty)                                                                                                                                                                                                                                           | Yes                                 | No                  |
| To experience familiar food?                                                                                                                                                                                                                                                        | Yes                                 | No                  |
| The appearance of the food?                                                                                                                                                                                                                                                         | Yes                                 | No                  |
| The odor of the food?                                                                                                                                                                                                                                                               | Yes                                 | No                  |
| The taste of the food?                                                                                                                                                                                                                                                              | Yes                                 | No                  |
| The texture of the food?                                                                                                                                                                                                                                                            | Yes                                 | No                  |
| To experience a satisfaction of the sense of sight, smell, taste and touch? (Pleased senses)                                                                                                                                                                                        | Yes                                 | No                  |
| To experience eating with others?                                                                                                                                                                                                                                                   | Yes                                 | No                  |
| To experience eating alone?                                                                                                                                                                                                                                                         | Yes                                 | No                  |
| To experience physical sensation in the body after eating?                                                                                                                                                                                                                          | Yes                                 | No                  |
| To experience mental sensations after eating?                                                                                                                                                                                                                                       | Yes                                 | No                  |
| To experience surprises from the meal?                                                                                                                                                                                                                                              | Yes                                 | No                  |
| Now we want you to evaluate how important each aspect is to your general sense of pleasure from food. You do this simply by marking the scale line. Try and think of how you feel in this current moment, and how important each aspect is to you in relation to the other aspects. |                                     |                     |
| In this moment, how important is the following to your experience of pleasure?                                                                                                                                                                                                      |                                     |                     |
| To experience memories of food?                                                                                                                                                                                                                                                     |                                     |                     |
| Not important                                                                                                                                                                                                                                                                       | Neither important nor not important | Extremely important |
|                                                                                                                                                                                                                                                                                     |                                     |                     |
| To have expectations towards the food fulfilled?                                                                                                                                                                                                                                    |                                     |                     |
| Not important                                                                                                                                                                                                                                                                       | Neither important nor not important | Extremely important |
|                                                                                                                                                                                                                                                                                     |                                     |                     |

|                                                                                      |                                     |                     |
|--------------------------------------------------------------------------------------|-------------------------------------|---------------------|
|                                                                                      |                                     |                     |
| To experience the satisfaction of needs?                                             |                                     |                     |
| Not important                                                                        | Neither important nor not important | Extremely important |
|    |                                     |                     |
| To experience having choices in the eating situation?                                |                                     |                     |
| Not important                                                                        | Neither important nor not important | Extremely important |
|    |                                     |                     |
| To maintain habits?                                                                  |                                     |                     |
| Not important                                                                        | Neither important nor not important | Extremely important |
|    |                                     |                     |
| To fulfill ethical values about food?                                                |                                     |                     |
| Not important                                                                        | Neither important nor not important | Extremely important |
|    |                                     |                     |
| To experience having desired product information about food?                         |                                     |                     |
| Not important                                                                        | Neither important nor not important | Extremely important |
|  |                                     |                     |
| To experience physical surroundings?                                                 |                                     |                     |
| Not important                                                                        | Neither important nor not important | Extremely important |
|  |                                     |                     |
| To experience food variation?                                                        |                                     |                     |
| Not important                                                                        | Neither important nor not important | Extremely important |
|  |                                     |                     |

|                                                                                              |                                     |                     |
|----------------------------------------------------------------------------------------------|-------------------------------------|---------------------|
|                                                                                              |                                     |                     |
| To experience new/unknown food? (Novelty)                                                    |                                     |                     |
| Not important                                                                                | Neither important nor not important | Extremely important |
| <div></div>                                                                                  |                                     |                     |
| To experience familiar food?                                                                 |                                     |                     |
| Not important                                                                                | Neither important nor not important | Extremely important |
| <div></div>                                                                                  |                                     |                     |
| The appearance of the food?                                                                  |                                     |                     |
| Not important                                                                                | Neither important nor not important | Extremely important |
| <div></div>                                                                                  |                                     |                     |
| The odor of the food?                                                                        |                                     |                     |
| Not important                                                                                | Neither important nor not important | Extremely important |
| <div></div>                                                                                  |                                     |                     |
| The taste of the food?                                                                       |                                     |                     |
| Not important                                                                                | Neither important nor not important | Extremely important |
| <div></div>                                                                                  |                                     |                     |
| The texture of the food?                                                                     |                                     |                     |
| Not important                                                                                | Neither important nor not important | Extremely important |
| <div></div>                                                                                  |                                     |                     |
| To experience a satisfaction of the sense of sight, smell, taste and touch? (Pleased senses) |                                     |                     |
| Not important                                                                                | Neither important nor not important | Extremely important |
| <div></div>                                                                                  |                                     |                     |

|                                                            |                                     |                     |
|------------------------------------------------------------|-------------------------------------|---------------------|
|                                                            |                                     |                     |
| To experience eating with others?                          |                                     |                     |
| Not important                                              | Neither important nor not important | Extremely important |
| <div></div>                                                |                                     |                     |
| To experience eating alone?                                |                                     |                     |
| Not important                                              | Neither important nor not important | Extremely important |
| <div></div>                                                |                                     |                     |
| To experience physical sensation in the body after eating? |                                     |                     |
| Not important                                              | Neither important nor not important | Extremely important |
| <div></div>                                                |                                     |                     |
| To experience mental sensations after eating?              |                                     |                     |
| Not important                                              | Neither important nor not important | Extremely important |
| <div></div>                                                |                                     |                     |
| To experience surprises from the meal?                     |                                     |                     |
| Not important                                              | Neither important nor not important | Extremely important |
| <div></div>                                                |                                     |                     |

**Table S2.** Overview of distributions and mean values for all variables based on the complete sample as well as the ‘Moderate stress’ and ‘High stress’ groups. Furthermore, statistical test and p-values are displayed.

|                                | All<br>n=190 (100%) | Moderate stress<br>n=116 (61%) | High stress<br>n=74 (39%) | Test           | Statistics                  | p-value |
|--------------------------------|---------------------|--------------------------------|---------------------------|----------------|-----------------------------|---------|
| <b>Socio-demographic</b>       |                     |                                |                           |                |                             |         |
| Gender, Female / male          |                     |                                |                           | X <sup>2</sup> | X <sup>2</sup> =1.94, df=1  | 0.163   |
| Female                         | 155 (82%)           | 91 (78%)                       | 64 (86%)                  |                |                             |         |
| Male                           | 35 (18%)            | 25 (22%)                       | 10 (14%)                  |                |                             |         |
| Age*                           | 44.61 ±11.31        | 45.43 ±10.79                   | 43.31 ±11.97              | Wilcoxon's     | W=3879                      | 0.264   |
| Education                      | 5 (3-5)             | 5 (4-5)                        | 4 (3-5)                   | X <sup>2</sup> | X <sup>2</sup> =28.85, df=6 | <0.001  |
| - Primary school               | 5 (3%)              | 0 (0%)                         | 5 (7%)                    |                |                             |         |
| - High School                  | 12 (6%)             | 4 (3%)                         | 8 (11%)                   |                |                             |         |
| - Vocational edu.              | 43 (22%)            | 21 (18%)                       | 22 (30%)                  |                |                             |         |
| - Short higher edu.            | 28 (14%)            | 15 (13%)                       | 13 (18%)                  |                |                             |         |
| - Medium higher edu.           | 68 (36%)            | 56 (48%)                       | 12 (16%)                  |                |                             |         |
| - Long higher edu.             | 33 (17%)            | 19 (16%)                       | 14 (19%)                  |                |                             |         |
| - PhD                          | 1 (1%)              | 1 (1%)                         | 0 (0%)                    |                |                             |         |
| People in residency            | 2 (2-4)             | 3 (2-4)                        | 2 (2-3)                   | X <sup>2</sup> | X <sup>2</sup> =9.10, df=8  | 0.334   |
| <b>Health and lifestyle</b>    |                     |                                |                           |                |                             |         |
| PSS-10 score*2                 | 25.39 ±4.84         | 22.29 ±2.96                    | 30.24 ±2.81               | Wilcoxon's     | W=8584                      | <0.001  |
| Stress type                    |                     |                                |                           | X <sup>2</sup> | X <sup>2</sup> =3.41, df=3  | 0.333   |
| - Type 1                       | 106 (55%)           | 67 (58%)                       | 39 (53%)                  |                |                             |         |
| - Type 2                       | 22 (12%)            | 16 (14%)                       | 6 (8%)                    |                |                             |         |
| - Type 3                       | 11 (6%)             | 5 (4%)                         | 6 (8%)                    |                |                             |         |
| - Type 4                       | 51 (27%)            | 28 (24%)                       | 23 (31%)                  |                |                             |         |
| Currently on sick leave        | 126 (66%)           | 82 (71%)                       | 44 (59%)                  | X <sup>2</sup> | X <sup>2</sup> =2.55, df=1  | 0.112   |
| Confirmed by doctor            | 159 (84%)           | 98 (84%)                       | 61 (82%)                  | X <sup>2</sup> | X <sup>2</sup> =0.14, df=1  | 0.709   |
| BMI*1                          | 28.00 ±6.40         | 27.91 ±5.54                    | 28.15 ±7.55               | Wilcoxon's     | W=3959                      | 0.577   |
| Smoking                        |                     |                                |                           | X <sup>2</sup> | X <sup>2</sup> =1.08, df=2  | 0.583   |
| - Yes                          | 25 (13%)            | 13 (11%)                       | 12 (16%)                  |                |                             |         |
| - No                           | 158 (83%)           | 99 (85%)                       | 59 (80%)                  |                |                             |         |
| - Rarely                       | 7 (4%)              | 4 (3%)                         | 3 (4%)                    |                |                             |         |
| Alcohol consumption            |                     |                                |                           | X <sup>2</sup> | X <sup>2</sup> =1.29, df=2  | 0.525   |
| - Never                        | 77 (41%)            | 43 (37%)                       | 34 (46%)                  |                |                             |         |
| - 1-2/week                     | 86 (45%)            | 55 (47%)                       | 31 (42%)                  |                |                             |         |
| - 3-4/week                     | 10 (5%)             | 7 (6%)                         | 3 (4%)                    |                |                             |         |
| - 4-5/week                     | 8 (3%)              | 4 (3%)                         | 4 (5%)                    |                |                             |         |
| - 6-7/week                     | 9 (5%)              | 7 (6%)                         | 2 (3%)                    |                |                             |         |
| Extrovert personality          | 3 (2-4)             | 3 (2-4)                        | 2 (1.25-4)                | X <sup>2</sup> | X <sup>2</sup> =8.32, df=4  | 0.081   |
| Introvert personality          | 3 (2-4)             | 3 (2-4)                        | 4 (3-4)                   | X <sup>2</sup> | X <sup>2</sup> =12.98, df=4 | 0.011   |
| <b>Pleasure</b>                |                     |                                |                           |                |                             |         |
| Snaith-Hamilton Pleasure Scale |                     |                                |                           |                |                             |         |

|                                               |              |              |              |                |                             |        |
|-----------------------------------------------|--------------|--------------|--------------|----------------|-----------------------------|--------|
| - Normal                                      | 98 (52%)     | 75 (65%)     | 23 (31%)     | X <sup>2</sup> | X <sup>2</sup> =20.39, df=1 | <0.001 |
| - Abnormal                                    | 92 (48%)     | 41 (35%)     | 51 (69%)     | X <sup>2</sup> | X <sup>2</sup> =20.39, df=1 | <0.001 |
| Food Pleasure Scale – I get pleasure from...  |              |              |              |                |                             |        |
| - Memories                                    | 73 (38%)     | 49 (42%)     | 24 (32%)     | X <sup>2</sup> | X <sup>2</sup> =1.84, df=1  | 0.175  |
| - Expectations                                | 105 (55%)    | 69 (59%)     | 36 (49%)     | X <sup>2</sup> | X <sup>2</sup> =2.15, df=1  | 0.143  |
| - Needs                                       | 112 (59%)    | 74 (64%)     | 38 (51%)     | X <sup>2</sup> | X <sup>2</sup> =2.89, df=1  | 0.089  |
| - Choice                                      | 88 (46%)     | 60 (52%)     | 28 (38%)     | X <sup>2</sup> | X <sup>2</sup> =3.50, df=1  | 0.061  |
| - Habits                                      | 86 (45%)     | 57 (49%)     | 29 (39%)     | X <sup>2</sup> | X <sup>2</sup> =1.80, df=1  | 0.179  |
| - Ethical values                              | 51 (27%)     | 32 (28%)     | 19 (26%)     | X <sup>2</sup> | X <sup>2</sup> =0.08, df=1  | 0.772  |
| - Product information                         | 43 (23%)     | 28 (24%)     | 15 (20%)     | X <sup>2</sup> | X <sup>2</sup> =0.39, df=1  | 0.534  |
| - Physical surroundings                       | 94 (49%)     | 59 (51%)     | 35 (47%)     | X <sup>2</sup> | X <sup>2</sup> =0.23, df=1  | 0.632  |
| - Variation                                   | 101 (53%)    | 69 (59%)     | 32 (43%)     | X <sup>2</sup> | X <sup>2</sup> =4.79, df=1  | 0.029  |
| - Familiarity                                 | 142 (75%)    | 90 (78%)     | 52 (70%)     | X <sup>2</sup> | X <sup>2</sup> =1.28, df=1  | 0.258  |
| - Novelty                                     | 81 (43%)     | 52 (45%)     | 29 (39%)     | X <sup>2</sup> | X <sup>2</sup> =0.59, df=1  | 0.444  |
| - Appearance                                  | 129 (68%)    | 86 (74%)     | 43 (58%)     | X <sup>2</sup> | X <sup>2</sup> =5.33, df=1  | 0.021  |
| - Odor                                        | 133 (70%)    | 87 (75%)     | 46 (62%)     | X <sup>2</sup> | X <sup>2</sup> =3.55, df=1  | 0.060  |
| - Taste                                       | 148 (78%)    | 95 (92%)     | 53 (72%)     | X <sup>2</sup> | X <sup>2</sup> =2.77, df=1  | 0.096  |
| - Texture                                     | 103 (54%)    | 69 (59%)     | 34 (46%)     | X <sup>2</sup> | X <sup>2</sup> =3.34, df=1  | 0.068  |
| - Pleased senses                              | 120 (63%)    | 82 (71%)     | 38 (51%)     | X <sup>2</sup> | X <sup>2</sup> =7.26, df=1  | 0.007  |
| - Physical sensation                          | 97 (51%)     | 67 (58%)     | 30 (41%)     | X <sup>2</sup> | X <sup>2</sup> =5.36, df=1  | 0.021  |
| - Mental sensation                            | 78 (41%)     | 54 (47%)     | 24 (32%)     | X <sup>2</sup> | X <sup>2</sup> =3.72, df=1  | 0.054  |
| - Surprise                                    | 69 (36%)     | 46 (40%)     | 23 (31%)     | X <sup>2</sup> | X <sup>2</sup> =1.44, df=1  | 0.231  |
| - Eating alone                                | 85 (45%)     | 54 (47%)     | 31 (42%)     | X <sup>2</sup> | X <sup>2</sup> =0.40, df=1  | 0.529  |
| - Eating with others                          | 137 (72%)    | 90 (78%)     | 47 (64%)     | X <sup>2</sup> | X <sup>2</sup> =4.45, df=1  | 0.035  |
| Food Pleasure Scale – importance for pleasure |              |              |              |                |                             |        |
| - Memories                                    | 42.78 ±24.23 | 44.86 ±23.31 | 39.51 ±25.25 | Wilcoxon's     | W=3750.5                    | 0.143  |
| - Expectations                                | 58.40 ±21.98 | 60.61 ±20.92 | 54.93 ±23.13 | Wilcoxon's     | W=3715                      | 0.119  |
| - Needs                                       | 59.62 ±21.55 | 61.37 ±19.79 | 56.87 ±23.79 | Wilcoxon's     | W=3734.5                    | 0.132  |
| - Choice                                      | 50.42 ±24.60 | 50.93 ±23.41 | 49.62 ±26.34 | Wilcoxon's     | W=4143.5                    | 0.689  |
| - Habits                                      | 48.48 ±23.97 | 48.32 ±24.28 | 48.73 ±23.47 | Wilcoxon's     | W=4382.5                    | 0.808  |
| - Ethical values                              | 42.98 ±27.21 | 45.55 ±26.01 | 38.95 ±28.53 | Wilcoxon's     | W=3590                      | 0.058  |
| - Product information                         | 38.70 ±27.65 | 41.11 ±27.33 | 34.92 ±27.73 | Wilcoxon's     | W=3710                      | 0.116  |
| - Physical surroundings                       | 55.09 ±24.74 | 57.78 ±22.15 | 50.89 ±27.81 | Wilcoxon's     | W=3590.5                    | 0.058  |
| - Variation                                   | 54.78 ±23.90 | 58.34 ±23.09 | 49.21 ±24.09 | Wilcoxon's     | W=3305.5                    | 0.008  |
| - Familiarity                                 | 57.21 ±21.76 | 57.16 ±21.51 | 57.28 ±22.14 | Wilcoxon's     | W=4184                      | 0.771  |
| - Novelty                                     | 44.59 ±24.43 | 45.55 ±22.86 | 43.10 ±26.64 | Wilcoxon's     | W=3952                      | 0.358  |
| - Appearance                                  | 62.81 ±24.10 | 65.48 ±20.58 | 58.64 ±28.26 | Wilcoxon's     | W=3731.5                    | 0.130  |
| - Odor                                        | 64.01 ±22.98 | 67.91 ±18.73 | 57.89 ±27.28 | Wilcoxon's     | W=3247.5                    | 0.0047 |
| - Taste                                       | 72.59 ±20.90 | 75.55 ±18.58 | 67.94 ±23.35 | Wilcoxon's     | W=3441                      | 0.021  |
| - Texture                                     | 58.61 ±26.36 | 60.84 ±26.65 | 55.13 ±25.52 | Wilcoxon's     | W=3653                      | 0.084  |
| - Pleased senses                              | 64.58 ±22.63 | 67.56 ±19.51 | 59.92 ±26.12 | Wilcoxon's     | W=3510.5                    | 0.035  |
| - Physical sensation                          | 57.96 ±23.63 | 61.44 ±22.20 | 52.50 ±24.74 | Wilcoxon's     | W=3128                      | 0.002  |
| - Mental sensation                            | 57.17 ±25.01 | 60.53 ±22.57 | 51.91 ±27.60 | Wilcoxon's     | W=3395                      | 0.015  |
| - Surprise                                    | 42.02 ±24.16 | 43.26 ±23.78 | 40.09 ±24.63 | Wilcoxon's     | W=4036.5                    | 0.490  |

|                                |              |              |              |                |                            |       |
|--------------------------------|--------------|--------------|--------------|----------------|----------------------------|-------|
| - Eating alone                 | 45.05 ±24.70 | 42.40 ±22.63 | 49.20 ±27.12 | Wilcoxon's     | W=4943.5                   | 0.078 |
| - Eating with others           | 57.54 ±26.45 | 57.95 ±24.23 | 56.90 ±29.58 | Wilcoxon's     | W=4284.5                   | 0.985 |
| <b>Food preference changes</b> |              |              |              |                |                            |       |
| Fruit and vegetables           |              |              |              | X <sup>2</sup> | X <sup>2</sup> =8.57, df=2 | 0.014 |
| - Less                         | 70 (37%)     | 34 (29%)     | 36 (49%)     |                |                            |       |
| - Same                         | 95 (50%)     | 63 (54%)     | 32 (43%)     |                |                            |       |
| - More                         | 23 (12%)     | 18 (16%)     | 5 (7%)       |                |                            |       |
| Meat and meat products         |              |              |              | X <sup>2</sup> | X <sup>2</sup> =1.49, df=2 | 0.474 |
| - Less                         | 31 (16%)     | 16 (14%)     | 15 (20%)     |                |                            |       |
| - Same                         | 150 (79%)    | 95 (82%)     | 55 (74%)     |                |                            |       |
| - More                         | 8 (4%)       | 5 (4%)       | 3 (4%)       |                |                            |       |
| Milk and dairy products        |              |              |              | X <sup>2</sup> | X <sup>2</sup> =0.49, df=2 | 0.783 |
| - Less                         | 27 (14%)     | 18 (16%)     | 9 (12%)      |                |                            |       |
| - Same                         | 152 (80%)    | 92 (79%)     | 60 (81%)     |                |                            |       |
| - More                         | 9 (5%)       | 5 (4%)       | 4 (5%)       |                |                            |       |
| Bread, pasta, rice, potatoes   |              |              |              | X <sup>2</sup> | X <sup>2</sup> =2.28, df=2 | 0.320 |
| - Less                         | 21 (11%)     | 11 (9%)      | 10 (14%)     |                |                            |       |
| - Same                         | 167 (72%)    | 89 (77%)     | 48 (65%)     |                |                            |       |
| - More                         | 30 (16%)     | 16 (14%)     | 14 (19%)     |                |                            |       |
| Salty snacks                   |              |              |              | X <sup>2</sup> | X <sup>2</sup> =0.73, df=2 | 0.693 |
| - Less                         | 33 (17%)     | 20 (17%)     | 13 (18%)     |                |                            |       |
| - Same                         | 96 (51%)     | 61 (53%)     | 35 (47%)     |                |                            |       |
| - More                         | 60 (32%)     | 34 (29%)     | 26 (35%)     |                |                            |       |
| Sweet treats                   |              |              |              | X <sup>2</sup> | X <sup>2</sup> =2.41, df=2 | 0.300 |
| - Less                         | 24 (13%)     | 18 (16%)     | 6 (8%)       |                |                            |       |
| - Same                         | 68 (36%)     | 39 (34%)     | 29 (39%)     |                |                            |       |
| - More                         | 97 (51%)     | 58 (50%)     | 39 (53%)     |                |                            |       |
| Fast-food and take-away        |              |              |              | X <sup>2</sup> | X <sup>2</sup> =0.87, df=2 | 0.648 |
| - Less                         | 26 (14%)     | 18 (16%)     | 8 (11%)      |                |                            |       |
| - Same                         | 85 (45%)     | 52 (45%)     | 33 (45%)     |                |                            |       |
| - More                         | 78 (41%)     | 46 (40%)     | 32 (43%)     |                |                            |       |
| Home-cooked meals              |              |              |              | X <sup>2</sup> | X <sup>2</sup> =5.52, df=2 | 0.063 |
| - Less                         | 64 (34%)     | 32 (28%)     | 32 (43%)     |                |                            |       |
| - Same                         | 105 (55%)    | 68 (59%)     | 37 (50%)     |                |                            |       |
| - More                         | 20 (11%)     | 15 (13%)     | 5 (7%)       |                |                            |       |
| Soft drinks                    |              |              |              | X <sup>2</sup> | X <sup>2</sup> =4.42, df=2 | 0.110 |
| - Less                         | 27 (14%)     | 21 (18%)     | 6 (8%)       |                |                            |       |
| - Same                         | 116 (61%)    | 70 (60%)     | 46 (62%)     |                |                            |       |
| - More                         | 47 (25%)     | 25 (22%)     | 22 (30%)     |                |                            |       |
| Coffee and Tea                 |              |              |              | X <sup>2</sup> | X <sup>2</sup> =8.01, df=2 | 0.018 |
| - Less                         | 40 (21%)     | 26 (22%)     | 14 (19%)     |                |                            |       |
| - Same                         | 115 (61%)    | 76 (66%)     | 39 (53%)     |                |                            |       |
| - More                         | 35 (18%)     | 14 (12%)     | 21 (28%)     |                |                            |       |
| Alcohol                        |              |              |              | X <sup>2</sup> | X <sup>2</sup> =1.29, df=2 | 0.525 |



|             |           |          |          |                |                             |       |
|-------------|-----------|----------|----------|----------------|-----------------------------|-------|
| - Less      | 69 (36%)  | 39 (34%) | 30 (41%) |                |                             |       |
| - Same      | 97 (51%)  | 63 (54%) | 34 (46%) |                |                             |       |
| - More      | 24 (13%)  | 14 (12%) | 10 (14%) |                |                             |       |
| Main meals  |           |          |          | X <sup>2</sup> | X <sup>2</sup> =10.37, df=2 | 0.006 |
| - Less      | 58 (31%)  | 26 (22%) | 32 (43%) |                |                             |       |
| - Same      | 115 (61%) | 76 (66%) | 39 (53%) |                |                             |       |
| - More      | 16 (8%)   | 13 (11%) | 3 (4%)   |                |                             |       |
| Snack meals |           |          |          | X <sup>2</sup> | X <sup>2</sup> =8.93, df=2  | 0.012 |
| - Less      | 63 (33%)  | 30 (26%) | 33 (45%) |                |                             |       |
| - Same      | 73 (38%)  | 53 (46%) | 20 (27%) |                |                             |       |
| - More      | 53 (28%)  | 33 (28%) | 20 (27%) |                |                             |       |

### Appetite

|                         |           |            |          |                |                             |       |
|-------------------------|-----------|------------|----------|----------------|-----------------------------|-------|
| General desire for food | 3 (2-4)   | 3 (2-4)    | 2 (2-4)  | X <sup>2</sup> | X <sup>2</sup> =12.03, df=4 | 0.017 |
| Meals before stress     |           |            |          |                |                             |       |
| - Breakfast             | 159 (84%) | 101 (87%)  | 58 (78%) | X <sup>2</sup> | X <sup>2</sup> =2.41, df=1  | 0.114 |
| - Pre Lunch Snack       | 67 (35%)  | 43 (37%)   | 24 (32%) | X <sup>2</sup> | X <sup>2</sup> =0.43, df=1  | 0.514 |
| - Lunch                 | 182 (96%) | 112 (97%)  | 70 (95%) | X <sup>2</sup> | X <sup>2</sup> =0.43, df=1  | 0.512 |
| - Pre Dinner Snack      | 107 (56%) | 69 (59%)   | 38 (51%) | X <sup>2</sup> | X <sup>2</sup> =1.21, df=1  | 0.271 |
| - Dinner                | 188 (99%) | 115 (99%)  | 73 (99%) | X <sup>2</sup> | X <sup>2</sup> =0.10, df=1  | 0.747 |
| - Post Dinner Snack     | 87 (46%)  | 47 (41%)   | 40 (54%) | X <sup>2</sup> | X <sup>2</sup> =3.34, df=1  | 0.068 |
| - Night meal            | 3 (2%)    | 1 (1%)     | 2 (3%)   | X <sup>2</sup> | X <sup>2</sup> =0.98, df=1  | 0.321 |
| Meals now               |           |            |          |                |                             |       |
| - Breakfast             | 132 (69%) | 87 (75%)   | 45 (61%) | X <sup>2</sup> | X <sup>2</sup> =4.29, df=1  | 0.038 |
| - Pre Lunch Snack       | 73 (38%)  | 47 (41%)   | 26 (35%) | X <sup>2</sup> | X <sup>2</sup> =0.55, df=1  | 0.457 |
| - Lunch                 | 140 (74%) | 90 (78%)   | 50 (68%) | X <sup>2</sup> | X <sup>2</sup> =2.34, df=1  | 0.126 |
| - Pre Dinner Snack      | 111 (58%) | 72 (62%)   | 39 (53%) | X <sup>2</sup> | X <sup>2</sup> =1.63, df=1  | 0.202 |
| - Dinner                | 184 (97%) | 116 (100%) | 68 (92%) | X <sup>2</sup> | X <sup>2</sup> =9.71, df=1  | 0.002 |
| - Post Dinner Snack     | 102 (54%) | 59 (51%)   | 43 (58%) | X <sup>2</sup> | X <sup>2</sup> =0.95, df=1  | 0.329 |
| - Night meal            | 16 (8%)   | 8 (7%)     | 8 (11%)  | X <sup>2</sup> | X <sup>2</sup> =0.90, df=1  | 0.343 |

\*Mean ± standard deviation, <sup>1</sup>BMI: Body Mass Index, <sup>2</sup>PSS-10: Perceived Stress Scale. Moderate stress level corresponds to a score of 14-26, High stress level to a score of 27-40.
